# Supplementary material for: Oxidative potential apportionment of atmospheric PM 1 : A new approach combining high-sensitive online analysers for chemical composition and offline OP measurement technique
Source: Copernicus journal article supplement (doi:10.5194/egusphere-2023-1441), 2023-07-28
Supplement: Supplementary file [file egusphere-2023-1441-AC3-supplement.pdf]

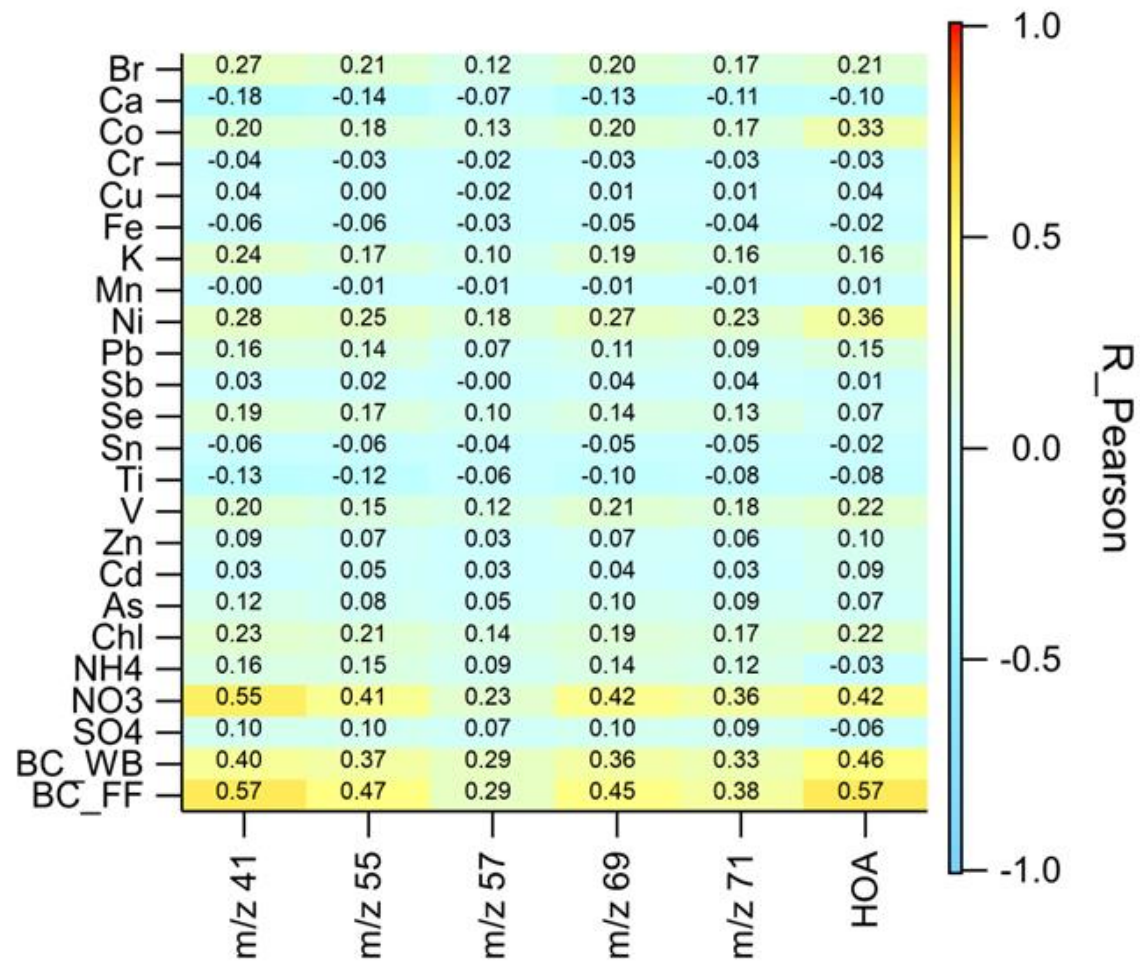

**Figure A4** – R Pearson correlation matrix between metals, BC, ACSM inorganic species and OA hydrocarbon fragments typically related to traffic exhaust.
